# Supplementary material for: Ring-whizzing in polyene-PtL2 complexes revisited
Source: Beilstein J Org Chem. 2016 Jul 7;12:1410–20. doi: 10.3762/bjoc.12.135 (PMC4979650; doi:10.3762/bjoc.12.135)
Supplement: File 1 — The molecular geometry and total electronic energy for the molecules in this work are given in .xyz format. The file may be opened as a text file to read the coordinates, or opened directly by a molecular modeling program such as Mercury (http://www.ccdc.cam.ac.uk/pages/Home.aspx). Molecular geometry and total electronic energy data. [file Beilstein_J_Org_Chem-12-1410-s001.xyz]

9
 8  linear (PH3)2Pt - -805.70919
Pt                 0.00001000    0.00019600   -0.00006800
 P                 -2.26881900   -0.00023700   -0.00028700
 P                  2.26869800   -0.00016000   -0.00010000
 H                 -2.97716400    1.18334200   -0.30616400
 H                 -2.97598500   -0.86101300   -0.86911800
 H                  2.97780100    1.17696500   -0.32846400
 H                  2.97207600   -0.30563000    1.18676800
 H                  2.97414600   -0.87669400   -0.85450800
 H                 -2.96980800   -0.32629600    1.18256200
13
9 Pt(dpe) -882.96303
Pt                    0.        0.        0.78836 
 P                     0.        1.70578  -0.66347 
 P                     0.       -1.70578  -0.66347 
 H                    -0.90195   2.78271  -0.92028 
 H                     1.1843    2.4032   -1.0431 
 H                     0.90195  -2.78271  -0.92028 
 H                    -1.1843   -2.4032   -1.0431 
 C                    -0.33065   0.69987  -2.23561 
 H                    -1.42398   0.59452  -2.29416 
 H                    -0.00932   1.26352  -3.12259 
 C                     0.33065  -0.69987  -2.23561 
 H                     0.00932  -1.26352  -3.12259 
 H                     1.42398  -0.59452  -2.29416 
19
10  C3H3Ptdpe-eta2   -998.86455
 C                 -2.35579400    0.80595200   -0.20920000
 C                 -2.35417500   -0.81506800   -0.16914000
 C                 -3.09608100    0.01547500    0.63971800
 H                 -2.72001900    1.63455400   -0.81758900
 H                 -2.71738200   -1.67309700   -0.73603500
 H                 -4.02273000    0.02827400    1.20674000
 Pt                -0.45508300   -0.00154600   -0.05076400
 P                  1.28077300    1.56620000   -0.01679200
 H                  1.56616900    2.22210000   -1.22926600
 H                  1.26292100    2.66506900    0.85851400
 P                  1.27788000   -1.56196100    0.10105300
 H                  1.32207600   -2.70079500   -0.72092200
 H                  1.48853300   -2.15608800    1.35991600
 C                  2.86401900    0.69230700    0.39491500
 C                  2.87692600   -0.69196500   -0.24919700
 H                  3.73138000    1.28537300    0.08272100
 H                  2.90448600    0.60920500    1.49016700
 H                  3.72904500   -1.28601100    0.10082600
 H                  2.96283400   -0.61174900   -1.34196900
19
11 C3H3Ptdpe-eta3    -998.85701
 C                  2.34285200    0.83368800   -0.01456800
 C                  2.60129100   -0.41397200    0.68659600
 C                  2.61072200   -0.43756700   -0.66308000
 H                  2.80512400    1.81465300   -0.03195200
 H                  2.91644200   -0.91054800    1.59537700
 H                  2.93006500   -0.96834400   -1.55093900
 Pt                 0.47623600    0.00803400   -0.00068600
 P                 -1.25414700    1.58078100   -0.06262000
 P                 -1.28516100   -1.61247400    0.05903500
 H                 -1.57947800   -2.23627400    1.28769400
 H                 -1.36240300   -2.72851100   -0.79339300
 C                 -2.85043600   -0.68649500   -0.32205500
 H                 -3.72992400   -1.25746400   -0.00297600
 H                 -2.90611500   -0.59368700   -1.41598700
 C                 -2.83372500    0.69463000    0.33241500
 H                 -1.50390400    2.17835000   -1.31199900
 H                 -1.27044500    2.71232400    0.76919500
 H                 -3.69908500    1.29063900    0.01932300
 H                 -2.88127500    0.60585700    1.42708200
23
13  C5H5Ptdpe+-eta3   -1076.31381
 C                 -2.34443000    0.75212100    0.99203300
 C                 -2.21063900    1.11269100   -0.41690000
 C                 -2.27853700   -0.07099500   -1.19788400
 C                 -2.21050100   -1.15443200   -0.28090500
 C                 -2.34694200   -0.62965100    1.07508000
 H                 -2.38769600    1.45388500    1.81720200
 H                 -2.23520500    2.12672900   -0.80306400
 H                 -2.27454200   -0.13603900   -2.27897800
 H                 -2.23436900   -2.20708700   -0.54465200
 H                 -2.39041600   -1.22812500    1.97793600
 Pt                -0.24896600   -0.00302500   -0.03691400
 P                  1.43094700   -1.54322700    0.09029800
 H                  1.42431000   -2.64919400   -0.77640000
 H                  1.64114300   -2.19222700    1.32266900
 P                  1.42713200    1.54810800   -0.03965600
 H                  1.67670100    2.22269600   -1.24982900
 H                  1.38135100    2.63741800    0.84717900
 C                  3.02227700    0.70029800    0.35877700
 C                  3.03358600   -0.69097000   -0.26493200
 H                  3.87542600    1.29985400    0.02017500
 H                  3.08121400    0.63702900    1.45418900
 H                  3.87776900   -1.28788000    0.09982500
 H                  3.12358000   -0.62873100   -1.35817600
23
14 C5H5Ptdpe+-radial    -1076.31354
 C                 -2.30928100   -0.41631300   -1.15412000
 C                 -2.18534000   -1.19606700    0.05222900
 C                 -2.29908000   -0.31868300    1.19069300
 C                 -2.27764200    0.98869700    0.69406700
 C                 -2.28421300    0.92744200   -0.76780600
 H                 -2.32804900   -0.80258300   -2.16604300
 H                 -2.19401000   -2.28071200    0.09781500
 H                 -2.30924900   -0.61952600    2.23131400
 H                 -2.31298400    1.90118900    1.27956000
 H                 -2.32401300    1.78846000   -1.42639500
 Pt                -0.25102200   -0.00243500   -0.00077500
 P                  1.42631800    1.54980100   -0.06756300
 H                  1.39971700    2.65112900    0.80496900
 H                  1.65849600    2.20707200   -1.29122900
 P                  1.42690500   -1.53857800    0.06100200
 H                  1.64974700   -2.20639900    1.28082700
 H                  1.40188900   -2.63312800   -0.82015900
 C                  3.02810300   -0.68932700   -0.30659000
 C                  3.02513500    0.70261500    0.31522900
 H                  3.87373800   -1.28825200    0.05154800
 H                  3.10937600   -0.62841300   -1.40060900
 H                  3.87441600    1.30102200   -0.03492000
 H                  3.09617100    0.64156700    1.40994400
21
15 C4H4Ptdpe-eta2   -1037.75098
 C                 -2.98761300   -0.65541200    0.84985600
 C                 -2.98620900    0.68874900    0.82601300
 C                 -2.26597000    0.71904700   -0.52649400
 C                 -2.26752900   -0.73573900   -0.50050700
 H                 -3.24116800   -1.39932800    1.60372700
 H                 -3.23811000    1.45947100    1.55300600
 H                 -2.49991200    1.36291100   -1.37452800
 H                 -2.50191200   -1.40982200   -1.32457100
 Pt                -0.30659000   -0.00522400   -0.14945400
 P                  1.40132600    1.57172400    0.03821500
 H                  1.83355500    2.25719700   -1.12252700
 H                  1.43586800    2.67817900    0.91826900
 P                  1.39894500   -1.56218500    0.16308600
 H                  1.62202700   -2.14989700    1.43348200
 H                  1.61250300   -2.72739000   -0.60856300
 C                  3.03122800   -0.68849400   -0.09497300
 C                  2.98051300    0.70051800    0.53500600
 H                  3.86693900   -1.27724100    0.30251600
 H                  3.17284600   -0.60740500   -1.18278400
 H                  2.95358300    0.61422300    1.63153800
 H                  3.86719700    1.29151800    0.27495300
21
16  C4H4Ptdpe-eclip-eta4  -1037.74055
 C                  2.37887600    0.64705200    0.80400200
 C                  2.37737000   -0.75760500    0.69995600
 C                  2.37887700   -0.64705200   -0.80400100
 C                  2.37737200    0.75760500   -0.69995500
 H                  2.48366700    1.35407700    1.61829300
 H                  2.48139000   -1.57634700    1.40209400
 H                  2.48366800   -1.35407700   -1.61829200
 H                  2.48139100    1.57634700   -1.40209300
 Pt                 0.34853600    0.00000000    0.00000000
 P                 -1.31288700   -1.56177900   -0.06521800
 H                 -1.65980000   -2.29000700   -1.23588800
 H                 -1.41710400   -2.65890900    0.82571800
 P                 -1.31288700    1.56177900    0.06521800
 H                 -1.65979800    2.29000700    1.23588700
 H                 -1.41710500    2.65890900   -0.82571900
 C                 -2.92460000    0.69976900   -0.30103500
 C                 -2.92460000   -0.69976800    0.30103600
 H                 -3.77579400    1.29108500    0.05981900
 H                 -3.00186500    0.64221500   -1.39606200
 H                 -3.00186400   -0.64221500    1.39606300
 H                 -3.77579400   -1.29108400   -0.05981700
25
17  C6F6Ptdpe-eta2  -1710.53946
 C                  2.02817600   -1.39967300    0.09704700
 C                  1.21196900   -0.70988400    1.05293700
 C                  1.20753700    0.74174700    1.03415800
 C                  2.01832400    1.41034100    0.05870100
 C                  2.69992700    0.70689900   -0.87607500
 C                  2.70527300   -0.71745000   -0.85667600
 F                  1.03346800   -1.33610700    2.24241200
 F                  1.02619900    1.39900800    2.20642800
 F                  1.98913300    2.74123700    0.04112400
 F                  3.31714000    1.31397900   -1.88704200
 F                  3.32797200   -1.34767600   -1.85008400
 F                  2.00963500   -2.73052300    0.11830100
 Pt                -0.61723500    0.00132400    0.24741700
 P                 -2.23227600   -1.61242100   -0.34942000
 P                 -2.21854400    1.59308900   -0.43963000
 H                 -2.06999100   -2.75218300   -1.16888600
 H                 -3.00505200   -2.22460400    0.66557400
 H                 -2.67483000    2.71687900    0.28453000
 H                 -2.09415900    2.22260100   -1.70120400
 C                 -3.56512400   -0.70603800   -1.29416100
 H                 -3.19260000   -0.59278700   -2.32323100
 H                 -4.48836100   -1.29588600   -1.34386300
 C                 -3.82319400    0.66668400   -0.67571700
 H                 -4.53074100    1.24513700   -1.28189600
 H                 -4.26688600    0.55256200    0.32468100
25
20  C6F6-Ptdpe-radial  -1710.52800
 C                  1.50916200   -0.73161600   -1.20692900
 C                  1.04654900   -1.35947200   -0.01167500
 C                  1.51572800   -0.76860000    1.20022400
 C                  2.45491200    0.25328100    1.20752200
 C                  2.94340400    0.76712700    0.01501000
 C                  2.45240300    0.28932500   -1.18933900
 F                  1.14118200   -1.26211500   -2.37472100
 F                  0.74722100   -2.68103300   -0.02947900
 F                  1.14037800   -1.32368000    2.35368100
 F                  2.84890300    0.77629600    2.36324300
 F                  3.78566300    1.79678400    0.03085800
 F                  2.84536600    0.84030300   -2.33215500
 Pt                -0.59414100   -0.04319800   -0.01404900
 P                 -2.65801500   -1.11815400   -0.06150600
 P                 -1.76847300    1.98356900    0.07862100
 H                 -3.19514700   -1.60481000   -1.27884000
 H                 -3.12526100   -2.16752200    0.76412100
 H                 -1.93226100    2.64631000    1.32014700
 H                 -1.65397800    3.14365600   -0.72401900
 C                 -3.54690200    1.53233100   -0.28883400
 C                 -3.91521400    0.19860000    0.35583800
 H                 -3.62643800    1.45683300   -1.38370300
 H                 -4.23089700    2.32685100    0.03398700
 H                 -4.92551300   -0.11191400    0.06174400
 H                 -3.90889600    0.29392900    1.45194700
27
C7H7Ptdpe+-eta3   -1153.68479
 C                 -2.45157900   -1.55709400    0.57354400
 C                 -1.80160900   -1.26739600   -0.69911100
 C                 -1.84785200   -0.03773200   -1.40396000
 C                 -2.99205600   -0.69077700    1.46212300
 C                 -1.80720200    1.22534700   -0.76124900
 C                 -2.98844700    0.75226400    1.42947500
 C                 -2.44878700    1.57517900    0.49991800
 H                 -2.53191100   -2.61914000    0.80496200
 H                 -1.62119200   -2.14203400   -1.32500200
 H                 -1.67210800   -0.06408400   -2.48036500
 H                 -3.48017700   -1.13350300    2.32985800
 H                 -1.63244000    2.06860300   -1.43031400
 H                 -3.47194000    1.23623100    2.27761300
 H                 -2.52416700    2.64696300    0.68288600
 Pt                 0.04798100   -0.00865200   -0.33847500
 P                  1.70263400    1.60258500    0.13978000
 H                  1.47180800    2.72740600    0.95305400
 H                  2.35402400    2.21768000   -0.94736300
 P                  1.69581700   -1.58649600    0.26538300
 H                  1.56708300   -2.20220000    1.52672600
 H                  2.02783400   -2.70658300   -0.51759500
 C                  3.08178000    0.71455500    1.01135900
 C                  3.30165500   -0.66638700    0.39622200
 H                  4.00309200    1.30787900    0.98366600
 H                  2.78544200    0.62626700    2.06625400
 H                  3.69672800   -0.57563400   -0.62563400
 H                  4.03323200   -1.24210900    0.97496800
27
C7H7Ptdpe+-eta2-TS  -1153.68030
 C                  2.33661200   -1.58302900   -0.11745900
 C                  3.04144300   -1.24602900    1.02970300
 C                  3.36839000    0.03106000    1.48934600
 C                  1.73891400   -0.76407300   -1.10768300
 C                  3.03988700    1.28414200    0.96999900
 C                  1.74371600    0.69947700   -1.14532500
 C                  2.33913900    1.56502100   -0.19496700
 H                  2.24042900   -2.65412700   -0.30877400
 H                  3.40461900   -2.07903700    1.62907800
 H                  3.97099200    0.05247500    2.39863400
 H                  1.53223800   -1.26551400   -2.05539700
 H                  3.40067000    2.14518500    1.52992000
 H                  1.54114300    1.15368200   -2.11736400
 H                  2.24517300    2.62553600   -0.43899700
 Pt                -0.12660200   -0.00717500   -0.34634500
 P                 -1.76196800    1.61092500    0.17705500
 H                 -2.43942500    2.23618500   -0.88966100
 H                 -1.55255900    2.73334000    1.00161300
 P                 -1.75295200   -1.59391500    0.29298500
 H                 -1.63331600   -2.21595700    1.55339300
 H                 -2.11515100   -2.71279900   -0.48048100
 C                 -3.35671100   -0.66777700    0.44164900
 C                 -3.13072500    0.71124000    1.05831100
 H                 -3.75927400   -0.57252400   -0.57696300
 H                 -4.08534400   -1.24320400    1.02447800
 H                 -2.82189000    0.61822200    2.10928300
 H                 -4.05352600    1.30286200    1.04412300
37
24  6-radialenePtdpe-eta2   -1347.27853
 C                 -2.83335800    0.23037400   -1.15196900
 C                 -1.96093400   -0.96944500   -1.10689500
 C                 -1.28931000   -1.20763300    0.20483200
 C                 -1.97577900   -0.57012300    1.36652700
 C                 -2.27749200    0.87459300    1.20177800
 C                 -2.50216000    1.31644200   -0.19712500
 C                 -0.37401800   -2.29008700    0.39936300
 C                 -2.32923200   -1.24941200    2.46594500
 C                 -2.34932500    1.71638600    2.24288500
 C                 -2.41927800    2.59040600   -0.60908300
 C                 -3.90003100    0.33673500   -1.95481200
 C                 -1.79695300   -1.74181000   -2.19316900
 H                 -1.18307700   -2.63919700   -2.17965500
 H                 -2.25324100   -1.47941000   -3.14515800
 H                 -0.22283800   -2.66953200    1.41084600
 H                 -0.24352700   -3.04536900   -0.37637300
 H                 -2.11687500   -2.31139100    2.56926600
 H                 -2.86091400   -0.77241300    3.28692000
 H                 -2.12955000    1.38414400    3.25524800
 H                 -2.63786100    2.75905900    2.12275400
 H                 -2.17728300    3.40783500    0.06934100
 H                 -2.59254200    2.84909000   -1.65208800
 H                 -4.19825800   -0.46823200   -2.62378500
 H                 -4.52714200    1.22619900   -1.93627500
 Pt                 0.74636300   -0.50629800    0.05547600
 P                  3.07439400   -0.62898000    0.01724800
 H                  3.87754000   -1.50048700   -0.75644700
 H                  3.80038900   -0.75267900    1.22815400
 P                  1.05164900    1.79541400   -0.25949100
 H                  0.82526600    2.41510300   -1.51239300
 H                  0.47777900    2.79810000    0.55600800
 C                  2.86999000    2.15666100   -0.01460800
 C                  3.71570400    1.02124900   -0.58714000
 H                  3.15364000    3.12159300   -0.45241900
 H                  3.02749700    2.23183600    1.07181900
 H                  4.77754200    1.15211800   -0.34455900
 H                  3.62958800    1.00239100   -1.68389100
40
25  6-radialene-flatPtdpe-eta2  —1461.57182
 C                 -2.66213800   -0.61080300    1.01806900
 C                 -1.61586200    0.33100900    1.47394700
 C                 -0.90891300    1.13774100    0.47858700
 C                 -1.54239600    1.33833700   -0.85408800
 C                 -2.48101400    0.33591700   -1.33423700
 C                 -3.02370500   -0.66834000   -0.39073800
 C                  0.06166100    2.17956400    0.65334400
 C                 -1.08657200    2.47776400   -1.41015800
 C                 -2.98760800    0.09769000   -2.56286400
 C                 -3.84807600   -1.49813600   -1.06659500
 C                 -3.15277700   -1.27049100    2.08929200
 C                 -1.50055900    0.23634600    2.81661600
 H                  0.33545600    2.55698300    1.63954700
 H                 -1.36659100    2.86420400   -2.38831900
 H                 -3.95145400   -2.00827900    2.08608800
 Pt                 1.05911200    0.32103700    0.13849600
 P                  3.37582700    0.21646200   -0.02745600
 H                  4.18329900    0.10179900    1.13288400
 H                  4.23869200    1.08118600   -0.74493000
 P                  1.07925500   -1.94005400   -0.48170000
 H                  0.44448800   -3.02468200    0.17031200
 H                  0.73984500   -2.31152000   -1.80649600
 C                 -2.45789200   -0.79556800    3.32609100
 C                 -3.90332200   -1.08304200   -2.50242200
 C                 -0.10439000    3.15844800   -0.49983800
 H                  0.83958500    3.40716500   -1.00789100
 H                 -0.51194600    4.11835100   -0.13315800
 H                 -0.80952600    0.79105500    3.44617500
 H                 -3.17241900   -0.38663600    4.06079900
 H                 -1.94196400   -1.61978100    3.84906500
 H                 -4.40387500   -2.33671100   -0.65494000
 H                 -2.76918500    0.65360100   -3.47100200
 H                 -3.58562800   -1.89076700   -3.18352500
 H                 -4.93039300   -0.82689900   -2.81484100
 C                  2.85953300   -2.51263600   -0.41113700
 C                  3.79431700   -1.39957400   -0.87715400
 H                  3.06234800   -2.75827900    0.64213600
 H                  3.01269100   -3.42841200   -0.99521400
 H                  4.84505000   -1.67148600   -0.71700000
 H                  3.66282600   -1.22324500   -1.95531800
40
26  6-radialene-flatPtPde-eta4  -1461.55064
 C                 -2.72084200   -0.25672800    0.81114500
 C                 -1.93556700    0.95235100    1.14432800
 C                 -1.05238200    1.53512000    0.14314700
 C                 -0.98622600    0.95752800   -1.21765900
 C                 -1.78393000   -0.21420800   -1.55547500
 C                 -2.63504800   -0.84146200   -0.51925500
 C                 -0.23100500    2.64575000    0.17748700
 C                 -0.12916300    1.73603200   -1.97232200
 C                 -1.90674600   -0.91016300   -2.70499800
 C                 -3.24316400   -1.92100400   -1.05652100
 C                 -3.45308500   -0.60676800    1.89043800
 C                 -2.21735600    1.32418500    2.41064600
 H                 -0.10396900    3.29997300    1.03588600
 H                  0.09211500    1.57807400   -3.02446000
 H                 -4.14287000   -1.44387200    1.96174900
 C                 -3.19923500    0.36191500    3.00097500
 C                 -2.83696900   -2.06179500   -2.48879400
 C                  0.19210000    3.00307700   -1.22356300
 H                  1.23663500    3.32356600   -1.31011000
 H                 -0.42575900    3.84312000   -1.60634600
 H                 -1.80165300    2.17456300    2.94429400
 H                 -4.12735300    0.85986700    3.32983700
 H                 -2.80136400   -0.13509400    3.90237900
 H                 -3.93950200   -2.58819800   -0.55493800
 H                 -1.40510900   -0.70095000   -3.64601500
 H                 -2.34659700   -3.03093600   -2.68548100
 H                 -3.70754300   -2.03390800   -3.16615500
 Pt                 0.95831900    0.31721700   -0.06433300
 P                  0.75384900   -1.86508100    0.69040700
 H                  0.44471100   -2.92932100   -0.20155700
 H                  0.02690000   -2.38443000    1.79521200
 P                  3.21658000    0.12543700    0.10034400
 H                  3.95438900    0.65914700    1.19002000
 H                  4.19719900    0.38079400   -0.89261700
 C                  3.54240900   -1.70226000    0.34431500
 C                  2.47896900   -2.34758200    1.22918300
 H                  3.51887300   -2.15019200   -0.66024800
 H                  4.54783600   -1.86854000    0.75246200
 H                  2.58316400   -1.98759200    2.26364100
 H                  2.59799600   -3.43824100    1.25068900
29
28  C8F8PtPde-eta2   -1986.33140
 C                  0.69409900   -0.72947600    0.74722300
 C                  1.33467700   -1.52820400   -0.29706900
 C                  2.62812700    1.55314200   -0.57511900
 C                  2.63885400   -1.54110900   -0.58769300
 C                  0.68855900    0.71064600    0.74837900
 C                  1.32402200    1.52608100   -0.28540800
 C                  3.64726700   -0.66296400   -0.03381900
 C                  3.64327300    0.67753700   -0.02966700
 Pt                -1.18997800   -0.01234800    0.23780300
 P                 -2.90917800   -1.57770400   -0.14899600
 H                 -2.82442800   -2.72408200   -0.96722100
 H                 -3.56434800   -2.17313700    0.95363200
 P                 -2.83942100    1.59243600   -0.26766200
 H                 -3.16493600    2.74308200    0.48168200
 H                 -2.80213100    2.19553600   -1.54556400
 F                  0.71418200    1.30510300    1.98504300
 F                  0.53177200    2.42436900   -0.89461100
 F                  3.11133300    2.47921500   -1.40774600
 F                  4.72533800    1.31513800    0.42151400
 F                  4.73337900   -1.29641100    0.41339500
 F                  0.74031400   -1.32740200    1.98087400
 F                  0.54922400   -2.42245200   -0.91885500
 F                  3.12919500   -2.45389300   -1.43096200
 C                 -4.48734400    0.72001800   -0.32405300
 C                 -4.32925500   -0.66577400   -0.94924000
 H                 -5.23987500    1.31137600   -0.85920600
 H                 -4.82497000    0.62737400    0.71893400
 H                 -4.07626000   -0.57191100   -2.01582000
 H                 -5.26213400   -1.23844400   -0.88424200
29
29  C8H8Ptdpe-eta2 TS   -1986.29141
 C                  0.58837700    0.74235400    1.51488400
 C                  0.58577600   -0.69305100    1.53388600
 C                  2.74345500    0.65900700   -1.11748100
 C                  1.40061400   -1.70697200    0.85263000
 C                  1.40521200    1.73386600    0.80484700
 C                  2.24670000    1.70425000   -0.24395100
 C                  2.24047300   -1.70935000   -0.19765100
 C                  2.73900800   -0.69027700   -1.10037500
 Pt                -0.96521200    0.00823500    0.30483800
 P                 -2.33032900   -1.60231300   -0.73935600
 H                 -3.33322400   -2.24335200    0.02194400
 H                 -1.87448700   -2.72839900   -1.45660000
 P                 -2.30951200    1.56853800   -0.84149200
 H                 -1.80191300    2.17801700   -2.01189200
 H                 -2.92874800    2.70255500   -0.27565000
 F                  1.08634300    2.96542900    1.22382400
 F                  0.17117600    1.27095500    2.70135100
 F                  2.64376800    2.91470200   -0.67012100
 F                  0.16667300   -1.18796200    2.73431500
 F                  3.31352400    1.19295700   -2.20790700
 F                  1.08152700   -2.92515300    1.30879800
 F                  3.30308000   -1.25619700   -2.17793100
 F                  2.63837600   -2.93189600   -0.58648800
 C                 -3.35290600   -0.72753600   -2.03110100
 C                 -3.78197300    0.64697900   -1.52104800
 H                 -4.49375900    0.53851900   -0.68938400
 H                 -4.28435500    1.22211600   -2.30786700
 H                 -4.22025400   -1.32808000   -2.33023000
 H                 -2.70772900   -0.61824400   -2.91535200
29
30  C8F8Ptdpe-diyl -1986.33942
 C                 -1.68354400   -0.70573900   -1.60467200
 C                 -0.82742500   -1.36513600   -0.59405600
 C                 -1.52639800    1.65559300    0.54077400
 C                 -1.58318900   -1.59334200    0.64831600
 C                 -1.66341900    0.62340600   -1.64952800
 C                 -0.78552600    1.31888200   -0.68451500
 C                 -2.17530900   -0.65334800    1.42718100
 C                 -2.14970900    0.79034400    1.37894500
 Pt                 0.72356700   -0.02897600   -0.20052100
 P                  2.40562600    1.59649600    0.18477500
 H                  2.24187500    2.72252100    1.01654800
 H                  2.99136400    2.24158000   -0.92546100
 P                  2.44264400   -1.59393900    0.28447300
 H                  2.47907900   -2.26827500    1.52561600
 H                  2.76254300   -2.68174900   -0.55141500
 C                  3.85675500    0.72533600    0.95442500
 C                  4.04670400   -0.64671000    0.30557300
 H                  4.84198800   -1.21282100    0.80485700
 H                  4.34499100   -0.52757200   -0.74654700
 H                  4.77316000    1.32348800    0.88552500
 H                  3.62203300    0.61117200    2.02287900
 F                 -0.34723000   -2.57552600   -1.06583400
 F                 -2.58477100   -1.44704100   -2.24277400
 F                 -2.54333200    1.34876600   -2.33448400
 F                 -1.62089300   -2.85427900    1.08239000
 F                 -0.25578300    2.47876200   -1.23456600
 F                 -2.82936600   -1.11449900    2.50284100
 F                 -2.78259000    1.34690900    2.42134400
 F                 -1.51080500    2.94109600    0.89721900
29
31 C8F8Ptdpe-eta2-bicyclo-TS  -1986.31068
 C                 -1.62610100   -1.65098500   -0.39658500
 C                 -0.86594200   -1.43718700    0.73425000
 C                 -2.44548300    1.43408100   -0.59689800
 C                 -0.90832400   -0.29896800    1.59346800
 C                 -1.32031400    1.73468800    0.07146200
 C                 -0.68279200    1.04417000    1.17132300
 C                 -2.85329700   -1.03708500   -0.72304500
 C                 -3.25120000    0.25152100   -0.53063500
 Pt                 0.90773100   -0.01889000    0.27244000
 P                  2.48477400   -1.57879700   -0.51798800
 H                  3.36736900   -2.25215200    0.35564800
 H                  2.15000300   -2.66573300   -1.35129100
 P                  2.27835300    1.60648800   -0.63935700
 H                  1.93785800    2.20072700   -1.87466600
 H                  2.66835500    2.76934800    0.05288900
 F                 -0.85751400   -0.53637200    2.90928000
 F                 -0.25537900   -2.53717000    1.26682300
 F                 -1.24126900   -2.67955000   -1.18621700
 F                 -3.75922600   -1.87590200   -1.24121100
 F                 -4.56294700    0.50259200   -0.70563000
 F                 -2.87309400    2.32477100   -1.50159700
 F                 -0.62672200    2.83238300   -0.30944500
 F                 -0.35314800    1.89390800    2.18174100
 C                  3.66038300   -0.61299500   -1.59389200
 C                  3.90148100    0.78302400   -1.01628700
 H                  4.51113400    1.39014800   -1.69622000
 H                  4.44441500    0.71353000   -0.06240600
 H                  3.17791900   -0.53270600   -2.57923100
 H                  4.60625200   -1.14862900   -1.73754800
29
32  Bicyclo-Ptdpe   -198636343
 C                  1.35898500    1.87176500   -0.33513800
 C                  0.78609600    1.16524100    0.79907900
 C                  2.42124800   -1.21117100   -0.87931800
 C                  1.73238500   -0.00786700    1.04447900
 C                  1.37110900   -1.86217900   -0.36775600
 C                  0.79524900   -1.18740300    0.78565000
 C                  2.41570200    1.23987400   -0.85656600
 C                  2.76830400    0.00764500   -0.11583500
 Pt                -0.83136300   -0.01209600    0.24157800
 P                 -2.45849600    1.59692200   -0.36531500
 H                 -2.76591400    2.76438900    0.36186200
 H                 -2.38870200    2.16615800   -1.65652300
 P                 -2.53328800   -1.58660500   -0.25432900
 H                 -2.39373900   -2.70112200   -1.10621600
 H                 -3.19644000   -2.22351200    0.81745700
 F                  2.31750200   -0.01197600    2.26063500
 F                  0.51360600    1.93952100    1.90231600
 F                  0.73385600    2.91349400   -0.87995700
 F                  3.00241900    1.51218900   -2.01362000
 F                  4.07976100    0.00786700    0.28376800
 F                  3.00484700   -1.45660000   -2.04438700
 F                  0.75849300   -2.89741900   -0.93539300
 F                  0.54597200   -1.98887800    1.87490900
 C                 -4.10006900    0.72118200   -0.42785700
 C                 -3.93427400   -0.65876800   -1.06435500
 H                 -4.43865700    0.62134900    0.61380600
 H                 -4.85348500    1.31274900   -0.96148300
 H                 -4.86935600   -1.22965700   -1.01960700
 H                 -3.66712500   -0.55530100   -2.12648200
29
28 C8H8Ptdpe-eta2  -1192.54729
 C                  1.53088600    0.70647500   -0.97951500
 C                  2.09494000    1.64521500    0.00913000
 C                  3.27521200   -1.62307000    0.67890100
 C                  3.26760500    1.63122700    0.66635000
 C                  1.53139300   -0.72008900   -0.97200600
 C                  2.10228200   -1.64827700    0.02231600
 C                  4.36522500    0.67929600    0.62249500
 C                  4.36803400   -0.66607600    0.62807500
 Pt                -0.39509500   -0.00360200   -0.33606300
 P                 -2.03452400    1.58444400    0.18692300
 H                 -1.89588100    2.72253200    1.01747300
 H                 -2.77415400    2.21659500   -0.84390600
 P                 -2.00695500   -1.57900400    0.30151100
 H                 -2.44073900   -2.71980100   -0.41593400
 H                 -1.91770700   -2.19982700    1.57244200
 C                 -3.63861800   -0.68338900    0.48593200
 C                 -3.41734400    0.70136300    1.08765300
 H                 -4.34873200   -1.26813500    1.08333200
 H                 -4.05900100   -0.59208100   -0.52673000
 H                 -3.09714500    0.61120800    2.13630000
 H                 -4.34136500    1.29228600    1.07736200
 H                  1.38144000   -1.18912300   -1.95226300
 H                  1.38307300    1.16570200   -1.96462800
 H                  1.48564700    2.54351700    0.14803800
 H                  3.48368200    2.52185800    1.26393500
 H                  5.35070000    1.15223700    0.66893400
 H                  3.49659400   -2.50895200    1.28156700
 H                  5.35558200   -1.13432400    0.67838200
 H                  1.49993900   -2.55037400    0.16607300
29
29  C8H8Ptdpe-eta2 TS  -1192.54292
 C                  1.55104400   -0.74465300   -1.30579700
 C                  1.55190100    0.68494600   -1.33433000
 C                  3.24106600   -0.64555400    1.66220100
 C                  2.19497800    1.71052200   -0.50301900
 C                  2.19737200   -1.73578100   -0.43578500
 C                  2.87233300   -1.69652600    0.73217400
 C                  2.87035100    1.71920500    0.66536700
 C                  3.24097000    0.70647900    1.63587000
 Pt                -0.29460000   -0.01066800   -0.47389800
 P                 -1.82596300    1.58560000    0.25691800
 H                 -2.69840800    2.21713000   -0.66328500
 H                 -1.53050900    2.72323700    1.04254300
 P                 -1.80299700   -1.56679400    0.38201600
 H                 -1.52544800   -2.19413900    1.62033000
 H                 -2.33472700   -2.69842400   -0.27945000
 C                 -3.06507700    0.72308800    1.35799800
 C                 -3.38428700   -0.66121300    0.79983400
 H                 -3.94723200   -0.56946900   -0.14111100
 H                 -4.00389500   -1.23933400    1.49614900
 H                 -3.97551100    1.32186200    1.48309200
 H                 -2.59156900    0.63214600    2.34677000
 H                  1.32853400   -1.17282700   -2.28754300
 H                  1.32991000    1.07398400   -2.33233400
 H                  2.06030500    2.70355900   -0.94212900
 H                  3.17806900    2.71860800    0.98301600
 H                  3.62462400    1.15571000    2.55587100
 H                  3.62518200   -1.05827300    2.59902300
 H                  3.18376800   -2.68159100    1.08864900
 H                  2.06620700   -2.74525400   -0.83665000
29
30  C8H8Ptdpe-diyl   -1192.54312
 C                 -2.45370100   -0.67127400   -1.46336500
 C                 -1.52616800   -1.36756600   -0.50383200
 C                 -2.16554600    1.62129700    0.77018200
 C                 -2.18216000   -1.61380600    0.78746800
 C                 -2.45274200    0.65714700   -1.47347500
 C                 -1.52261800    1.36486000   -0.52597100
 C                 -2.80449200   -0.70957600    1.59646000
 C                 -2.79336100    0.73013900    1.59016400
 H                 -3.18664500    1.24316300   -2.03443100
 H                 -3.18946900   -1.26455100   -2.01422700
 H                 -1.13755500   -2.30657500   -0.92234600
 H                 -2.16785500   -2.64529500    1.15710100
 H                 -3.28431500   -1.13414400    2.48201600
 H                 -2.13547300    2.65416300    1.13503400
 H                 -1.13964300    2.30116000   -0.95490100
 H                 -3.26153400    1.16857600    2.47527000
 Pt                 0.10232700   -0.00053800   -0.21124400
 P                  1.83585700    1.58264500    0.04492700
 H                  1.80979500    2.72087600    0.88521200
 H                  2.41067500    2.21062400   -1.08783500
 P                  1.81143500   -1.58340900    0.16499500
 H                  1.92933200   -2.21244000    1.42930500
 H                  2.09537400   -2.72093100   -0.62732400
 C                  3.32503600    0.68680100    0.72448300
 C                  3.44686600   -0.69017900    0.07544600
 H                  4.25123800   -1.27628400    0.53618400
 H                  3.68771300   -0.58514400   -0.99286800
 H                  4.24266800    1.27208200    0.58997500
 H                  3.15813600    0.58108300    1.80666900
29
31  C8H8Ptdpe-bicy-eta-TS  -1192.52794
 C                 -2.12244700    1.80467300    0.11119900
 C                 -1.54422800    1.22399300   -1.06328200
 C                 -3.00970600   -1.22519200    1.18826100
 C                 -1.59471900   -0.07905100   -1.66594400
 C                 -2.15081800   -1.79745200    0.26333100
 C                 -1.55284400   -1.32295200   -0.94741400
 C                 -2.98398500    1.32476600    1.08514700
 C                 -3.45646800    0.06812800    1.47408600
 Pt                 0.19653000   -0.01806300   -0.35207900
 P                  1.73452200    1.59366000    0.23458700
 H                  2.43276300    2.34618100   -0.74324900
 H                  1.45628600    2.65211800    1.12664400
 P                  1.74904400   -1.55542400    0.36561000
 H                  1.64424400   -2.16997900    1.63641400
 H                  2.14868100   -2.70061300   -0.36344100
 C                  3.13947300    0.73881800    1.11464500
 C                  3.36987900   -0.65074300    0.52607300
 H                  4.08245500   -1.22461600    1.13107800
 H                  3.78750900   -0.57215700   -0.48800700
 H                  2.83731900    0.65711400    2.16869600
 H                  4.05495700    1.34257900    1.08241500
 H                 -3.42269800   -1.97056500    1.87578400
 H                 -1.96089600   -2.86185900    0.42228300
 H                 -1.20532700   -2.14504200   -1.58185200
 H                 -1.30755300   -0.12720000   -2.71556000
 H                 -1.20043300    1.98525700   -1.77131500
 H                 -1.91386500    2.87524900    0.18121700
 H                 -3.37732000    2.13100500    1.71287600
 H                 -4.20379600    0.10800900    2.26863500
29
32 C8H8Ptdpe-bicyclo  -1192.55716
 C                  2.01184600   -1.84895600    0.54836600
 C                  1.53320000   -1.18829400   -0.67992600
 C                  3.07158700    1.25455300    1.05611700
 C                  2.49614100   -0.01490400   -0.90901500
 C                  2.01047400    1.85778400    0.49751400
 C                  1.53554100    1.16666900   -0.71526200
 C                  3.07467000   -1.23231600    1.08831400
 C                  3.46649200    0.00183800    0.31367000
 Pt                -0.17826500   -0.00336100   -0.30275100
 P                 -1.88404300   -1.58079600    0.20175400
 H                 -2.25702100   -2.70243700   -0.57596000
 H                 -1.88796600   -2.23359500    1.45979900
 P                 -1.89834500    1.58705800    0.10247700
 H                 -1.79408500    2.72414400    0.93855400
 H                 -2.57626800    2.22193800   -0.96824300
 C                 -3.51607900   -0.67548400    0.28140800
 C                 -3.32458300    0.69793000    0.91931700
 H                 -3.85938900   -0.56384300   -0.75779600
 H                 -4.27529600   -1.26005200    0.81498000
 H                 -4.24672000    1.28999800    0.87388600
 H                 -3.05705500    0.58860400    1.98075500
 H                  1.33448500   -1.84427100   -1.53694000
 H                  1.53016600   -2.73274300    0.97117200
 H                  3.01388000   -0.03030300   -1.87771400
 H                  4.53741100   -0.00017600    0.04651300
 H                  3.57882400   -1.53332800    2.00589300
 H                  3.57288400    1.57845300    1.96746000
 H                  1.52841200    2.75258800    0.89568800
 H                  1.34252000    1.80030400   -1.58996100
27
40  pentalenePtpde-out-eta2  -1191.34584
 C                  3.23537900    1.59667500   -0.13894700
 C                  4.01269400    1.34806800    1.08518600
 C                  3.78691500    0.08686000    1.54381800
 C                  2.86124600   -0.52712300    0.60777400
 C                  2.54663200    0.46214000   -0.42341500
 C                  2.16125200   -1.66142300    0.35726600
 C                  1.34122300   -1.48347300   -0.86729500
 C                  1.55840100   -0.13736700   -1.34723000
 H                  3.23433000    2.53564700   -0.68700300
 H                  4.67995000    2.07775800    1.53845000
 H                  4.23222100   -0.37879300    2.41684800
 H                  2.15218300   -2.57305600    0.95305100
 H                  1.50671900    0.12594900   -2.40240200
 H                  1.10267500   -2.32680700   -1.51406100
 Pt                -0.35794200   -0.26328400   -0.36929200
 P                 -1.55660700    1.72816900   -0.26873700
 H                 -1.15878600    2.73144000    0.64744800
 H                 -1.85991800    2.58236600   -1.35411300
 P                 -2.17590100   -1.17707500    0.78007800
 H                 -2.13937300   -1.97714100    1.94615500
 H                 -3.14700600   -1.93268200    0.07788800
 C                 -3.23414600    0.23802800    1.39122100
 C                 -3.28079700    1.34961400    0.34665800
 H                 -4.24273700   -0.10133800    1.65700100
 H                 -2.75735200    0.60442500    2.31241500
 H                 -3.85946300    1.02157800   -0.52966600
 H                 -3.76911100    2.24839300    0.74245200
27
41  pentalenePtdpe-eta3-out1  -1191.33488
 C                  3.00040300    1.31675900    1.08291000
 C                  3.39933700    0.26858300    1.93280100
 C                  2.99132800   -0.97751100    1.40709500
 C                  2.34211600   -0.70993200    0.19578200
 C                  2.34641100    0.72273100   -0.00904500
 C                  1.64782600   -1.29829900   -0.92643800
 C                  1.40889800   -0.27644200   -1.91117700
 C                  1.66548900    0.97905700   -1.24989300
 H                  3.19741200    2.37388300    1.23757500
 H                  3.96429200    0.39735300    2.85329000
 H                  3.18196000   -1.94953500    1.85352100
 H                  1.52735300   -2.36114000   -1.12343500
 H                  1.55229600    1.94605500   -1.73485500
 H                  1.04283600   -0.41736300   -2.92126000
 Pt                -0.20060800   -0.05776700   -0.39043900
 P                 -1.71315100   -1.50053100    0.55905500
 H                 -2.16617800   -2.69997500   -0.03788500
 H                 -1.53524500   -2.00518500    1.87207200
 P                 -1.71234500    1.60910200    0.08551100
 H                 -1.38918500    2.76343800    0.83504800
 H                 -2.47880400    2.25093500   -0.91920000
 C                 -3.32067500   -0.57605800    0.73069100
 C                 -3.05242300    0.86674800    1.14658100
 H                 -3.98855400   -1.07833500    1.44122800
 H                 -3.80483000   -0.60595800   -0.25595800
 H                 -2.67780700    0.89945300    2.17984100
 H                 -3.96794800    1.46984400    1.10994400
27
42  pentalenePtPde-eta3-inner  -1191.34277
 C                  1.63119700   -1.33275100   -0.77417200
 C                  2.09789100   -2.13908900    0.34731400
 C                  2.78960100   -1.33730900    1.22842000
 C                  2.81941100    0.00062900    0.71309900
 C                  2.22558100   -0.01724700   -0.56029400
 C                  2.79865600    1.35435600    1.18595700
 C                  2.11247700    2.13292600    0.28002200
 C                  1.64089700    1.29554800   -0.81620800
 H                  1.43283300   -1.77366100   -1.75425300
 H                  2.00694300   -3.22212300    0.40595500
 H                  3.23105700   -1.67456300    2.16455600
 H                  3.24260100    1.71774400    2.11111500
 H                  2.03020500    3.21797600    0.30465300
 H                  1.44991800    1.70777400   -1.81002200
 Pt                -0.13114400   -0.00490700   -0.38794500
 P                 -1.72176900   -1.57777900    0.19542300
 H                 -2.18050700   -2.66492700   -0.58206300
 H                 -1.52342900   -2.26881900    1.41332800
 P                 -1.72225100    1.59174600    0.11312900
 H                 -1.43697100    2.70823000    0.92979900
 H                 -2.50099400    2.24756700   -0.87049900
 C                 -3.03975700    0.71708200    1.10371900
 C                 -3.31858500   -0.66524700    0.51380900
 H                 -3.95824900    1.31351700    1.16332300
 H                 -2.64378700    0.62148500    2.12517900
 H                 -3.81710200   -0.56579300   -0.46174500
 H                 -3.98722100   -1.24455800    1.16208700
27
43  pentalene-Ptdpe eta2-eta3 TS   -1191.33421
 C                  2.08621500   -1.31024300   -0.83781700
 C                  2.74332400   -1.97370000    0.21763600
 C                  3.10400600   -1.03079400    1.20514800
 C                  2.67834000    0.24379900    0.80150800
 C                  2.09443600    0.10161700   -0.49248800
 C                  2.53283100    1.62302800    1.19763700
 C                  1.82820900    2.28138100    0.23624500
 C                  1.44964100    1.36416900   -0.85988800
 H                  1.84311200   -1.73089000   -1.81028000
 H                  2.96109600   -3.03722600    0.25073100
 H                  3.62063100   -1.27756900    2.13073200
 H                  2.90846700    2.06886900    2.11621200
 H                  1.61192400    3.35452800    0.22566900
 H                  1.23874900    1.68379800   -1.87184300
 Pt                -0.13275800   -0.08681700   -0.34610100
 P                 -1.79910900   -1.61478200    0.19494100
 H                 -2.60990200   -2.13036700   -0.84590600
 H                 -1.72791800   -2.78898200    0.98253800
 P                 -1.77169700    1.49151500    0.01542800
 H                 -1.54576000    2.32720600    1.13352200
 H                 -2.25270000    2.46476900   -0.88950700
 C                 -3.36896000    0.64544600    0.45137700
 C                 -3.07840200   -0.66276300    1.15723100
 H                 -4.04468800    1.28487600    1.03154600
 H                 -3.85857800    0.43774000   -0.51255400
 H                 -3.99770600   -1.24651600    1.28797200
 H                 -2.64732400   -0.48114400    2.15198700
35
45  pheneleniumPtdpe-out-eta3  -1383.48166
 C                  0.43023200   -0.06891100   -2.24523500
 C                  0.71985200   -1.25412500   -1.52897100
 C                  1.78647000   -1.25999400   -0.52652100
 C                  2.30984100   -0.00912800   -0.08499300
 C                  1.78494600    1.21559400   -0.59203000
 C                  0.71706300    1.15465400   -1.59197100
 C                  2.30271200   -2.43649500   -0.01530900
 C                  3.35745400    0.01663500    0.87040300
 C                  3.85742000   -1.21200000    1.36789300
 C                  3.34120900   -2.41015300    0.93354000
 C                  3.85444800    1.27051000    1.30402000
 C                  3.33520800    2.44329400    0.80855200
 C                  2.29770800    2.41811900   -0.14155500
 H                 -0.15296600   -0.09381100   -3.16423000
 H                  0.41835700    2.08740600   -2.07000600
 H                  1.90417700    3.35377800   -0.53976000
 H                  3.72991600    3.39921800    1.14553400
 H                  3.73876500   -3.34691200    1.31780900
 H                  1.91097300   -3.39202500   -0.36494200
 H                  0.41736700   -2.21143200   -1.95296500
 H                  4.66123500   -1.19135700    2.10284600
 H                  4.65807100    1.29000700    2.03920400
 Pt                -0.91000800   -0.01339800   -0.50844500
 P                 -2.19698700    1.60894900    0.57713200
 P                 -2.22050000   -1.55876100    0.66424500
 H                 -1.61007000    2.71205800    1.22459100
 H                 -3.21057400    2.26039600   -0.15280900
 H                 -1.60787500   -2.21721600    1.74960200
 H                 -2.86756600   -2.64771400    0.05272000
 C                 -3.61407100   -0.61865800    1.45103000
 H                 -4.39108100   -0.50483400    0.68161600
 H                 -4.05619200   -1.19208000    2.27402000
 C                 -3.13023900    0.74827800    1.93124800
 H                 -3.96831300    1.36255300    2.28045900
 H                 -2.43277900    0.63850800    2.77379800
35
46  phenelenePtdpe-eta3-inner  -1383.48218
 C                 -4.32376900   -0.02811000    1.78942000
 C                 -3.82100700    1.19027300    1.34654200
 C                 -2.80689900    1.23399900    0.38332000
 C                 -2.31524300    0.01057900   -0.13950500
 C                 -2.80874300   -1.23296800    0.33227900
 C                 -3.82193700   -1.22779600    1.29733000
 C                 -2.23463900    2.47111800   -0.07442300
 C                 -1.31549200    0.03078000   -1.16239100
 C                 -0.69763800    1.27113600   -1.52913300
 C                 -1.22199900    2.49535600   -0.97749400
 C                 -0.70293900   -1.19510500   -1.58227400
 C                 -1.22978000   -2.44039600   -1.08285100
 C                 -2.24023300   -2.45130000   -0.17726100
 H                 -5.11353000   -0.04322400    2.53746600
 H                 -4.21116800   -2.17628700    1.66554800
 H                 -2.64796800   -3.39565600    0.18226300
 H                 -0.82464700   -3.37293200   -1.47140100
 H                 -0.81379200    3.44208200   -1.32637900
 H                 -2.64060500    3.40112000    0.32255200
 H                 -4.20986500    2.12361000    1.75202200
 H                 -0.16223600    1.32438200   -2.48149700
 H                 -0.16824400   -1.20912500   -2.53637900
 Pt                 0.83580200    0.00994000   -0.43873800
 P                  2.21541500   -1.60454900    0.51431700
 P                  2.23881300    1.56325400    0.58467300
 H                  1.67102200   -2.71608500    1.18514800
 H                  3.18430900   -2.24715300   -0.28224800
 H                  1.70456800    2.26346000    1.68478500
 H                  2.85342500    2.62592800   -0.10247200
 C                  3.67363700    0.62841500    1.30196800
 H                  4.40917200    0.51544600    0.49282100
 H                  4.15776300    1.20456600    2.09902800
 C                  3.22388000   -0.74106700    1.81010900
 H                  4.08450200   -1.35104300    2.10850400
 H                  2.57813700   -0.63446300    2.69311000
35
47  phenelenePtdpe-eta1-TS
 C                  0.61518700   -1.23450300   -2.02265700
 C                  1.52555300   -1.94360400   -1.28641200
 C                  2.48589700   -1.29385800   -0.43237000
 C                  2.38030300    0.11190300   -0.24828400
 C                  1.37279000    0.85848500   -0.93370600
 C                  0.45722500    0.18931000   -1.85539400
 C                  3.48616100   -1.99182700    0.22560800
 C                  3.29025700    0.77893900    0.61358200
 C                  4.29656300    0.02230200    1.27342800
 C                  4.39396100   -1.33301000    1.07637200
 C                  3.16983300    2.17099100    0.78852500
 C                  2.18029400    2.89248500    0.14045700
 C                  1.29111700    2.24574000   -0.71392300
 H                 -0.02832100   -1.75041600   -2.73272000
 H                  0.02283700    0.77383600   -2.66683600
 H                  0.53013800    2.81585600   -1.24763600
 H                  2.10448500    3.96727200    0.28676300
 H                  5.17040900   -1.90435300    1.57937200
 H                  3.56447500   -3.06942800    0.08362400
 H                  1.58529000   -3.02599800   -1.39782800
 H                  4.99039100    0.53891600    1.93529400
 H                  3.87322600    2.67982800    1.44703900
 Pt                -0.81516800   -0.10483800   -0.16402200
 P                 -2.93573200    0.37864800   -0.92942200
 P                 -1.79517700   -0.50138700    1.93516600
 H                 -3.28172400    1.52201700   -1.67731900
 H                 -3.60789900   -0.59977700   -1.69227800
 H                 -1.64576000    0.46605400    2.95033100
 H                 -1.62239800   -1.66656400    2.70737800
 C                 -3.62895700   -0.49990100    1.63123900
 H                 -3.88965000   -1.50972800    1.28347600
 H                 -4.17955100   -0.32740000    2.56333900
 C                 -4.00479300    0.54139000    0.57873600
 H                 -5.06449000    0.46196900    0.30789700
 H                 -3.84308700    1.55729800    0.96642300
31
48 C10F8-Pt(dpe) eta2-side  -2062.55760
 C                  4.01436300   -0.66801000   -0.69543600
 C                  3.39922900    0.55867400   -0.85695000
 C                  2.20850400    0.85577000   -0.18810800
 C                  1.64525400   -0.11811900    0.67255600
 C                  2.27328600   -1.35317300    0.80392300
 C                  3.44388900   -1.63315500    0.12619000
 C                  1.52015900    2.10254200   -0.38133300
 C                  0.39620300    0.16722000    1.36699400
 C                 -0.23253500    1.45423300    1.18660800
 C                  0.38890700    2.39536900    0.29062400
 Pt                -1.34300200   -0.02550800    0.17898700
 P                 -3.33673000    0.63732500   -0.89116200
 H                 -3.28269900    1.21564100   -2.18130100
 H                 -4.35535300    1.45761400   -0.35853100
 P                 -1.92146800   -2.20411800   -0.52126100
 H                 -1.11579500   -3.13105500   -1.22035900
 H                 -2.46214500   -3.10445200    0.42565100
 F                  0.23481100   -0.40277100    2.59018300
 F                 -0.90124300    2.00694800    2.23119200
 F                 -0.26129800    3.53626500    0.07455600
 F                  1.97427800    2.95125900   -1.30436800
 F                  3.98232700    1.44594200   -1.65640600
 F                  5.14658700   -0.94066900   -1.33336500
 F                  4.01830800   -2.82506800    0.23452400
 F                  1.70903700   -2.33048200    1.51355100
 C                 -4.29802700   -0.92270200   -1.25088000
 H                 -5.08468300   -0.74469300   -1.99391600
 H                 -4.79372900   -1.20549700   -0.31028500
 C                 -3.35679300   -2.03730500   -1.70473200
 H                 -3.89411000   -2.98680300   -1.81572200
 H                 -2.92429700   -1.79010500   -2.68574600
31
50 C10F8-Pt(dpe) eta3  —2062.53574
 C                 -3.31241000   -1.51517700   -0.17078900
 C                 -3.18244400   -0.24683300   -0.65405300
 C                 -2.15855400    0.61322900   -0.18512100
 C                 -1.20039300    0.08746900    0.76285200
 C                 -1.41491100   -1.22456400    1.27484300
 C                 -2.42013000   -2.01086300    0.80581500
 C                 -2.01603000    1.92301900   -0.62827300
 C                 -0.19466700    0.96160000    1.34754300
 C                 -0.12277600    2.27380100    0.82263600
 C                 -0.97467200    2.71918600   -0.16914600
 F                 -4.05087800    0.18483700   -1.56305700
 F                 -4.27575200   -2.31766100   -0.60688000
 F                 -2.56336200   -3.26439100    1.22100300
 F                 -0.55507900   -1.73311400    2.15984800
 F                  0.18413700    0.81361900    2.64334300
 F                  0.80342100    3.09634500    1.30838400
 F                 -0.79688000    3.93132900   -0.68384000
 F                 -2.81628700    2.42676300   -1.56495900
 Pt                 1.02969500   -0.07847600   -0.03403900
 P                  3.25540300   -0.14720100    0.67060600
 H                  4.06152000    0.93502400    1.09238300
 H                  3.70448400   -1.08759900    1.62960700
 P                  1.70877100   -1.19742400   -1.97643400
 H                  1.91236500   -0.52329100   -3.20550200
 H                  1.17902900   -2.39199400   -2.51704900
 C                  3.45382700   -1.76302800   -1.61521500
 C                  4.22127900   -0.70124500   -0.82963300
 H                  3.36313400   -2.68175400   -1.01671300
 H                  3.98338900   -2.02657500   -2.53900400
 H                  4.36953100    0.19534000   -1.44998700
 H                  5.21515300   -1.06775300   -0.54457200
31
52  C10F8-Pt(dpe) eta4  -2062.52890
 C                  4.06172300    0.05001900   -1.00191700
 C                  3.02011400    0.94470800   -1.04248800
 C                  1.94891500    0.84075100   -0.14254000
 C                  1.95399500   -0.21651800    0.81851500
 C                  3.03061000   -1.11595600    0.83202700
 C                  4.06668300   -0.98510600   -0.06149700
 C                  0.85536000    1.74227500   -0.15532500
 C                  0.86127300   -0.32392100    1.71549200
 C                 -0.11403800    0.66161700    1.79234900
 C                 -0.11793700    1.71667400    0.83639200
 Pt                -1.33875800   -0.03843700   -0.02897000
 P                 -3.63655100    0.29644000    0.19060500
 H                 -4.31187800    1.40665900   -0.37686000
 H                 -4.44126400    0.19125800    1.35135400
 P                 -1.74693600   -1.64161000   -1.64930500
 H                 -1.23751400   -1.75900500   -2.96566600
 H                 -1.72609000   -3.02202300   -1.33090500
 F                  0.81620700   -1.31773500    2.59879900
 F                 -0.91128500    0.74469200    2.86068000
 F                 -0.91187800    2.77200300    1.03551300
 F                  0.79881100    2.72247800   -1.05366600
 F                  3.04078700    1.91038800   -1.95581400
 F                  5.07606800    0.15694700   -1.85184900
 F                  5.08556900   -1.83625700   -0.04524300
 F                  3.06633000   -2.11924900    1.70369200
 C                 -4.38254900   -1.09773600   -0.80709700
 H                 -5.42076500   -0.86934000   -1.07891800
 H                 -4.40776100   -1.97003900   -0.13706100
 C                 -3.56007600   -1.41929700   -2.05391000
 H                 -3.95929100   -2.30442600   -2.56500100
 H                 -3.60994000   -0.58190500   -2.76577000
31
53 C10F8-Pt(dpe) eta 2-end  -2062.53549
 C                 -4.10965200   -0.67569700   -0.86604800
 C                 -3.14487200   -1.36915900   -0.21150800
 C                 -2.06951300   -0.69581100    0.43702500
 C                 -2.01785600    0.75539000    0.36908800
 C                 -3.04744800    1.43054600   -0.35031300
 C                 -4.05939100    0.74265600   -0.93448500
 C                 -1.07423500   -1.37080400    1.11043700
 C                 -0.98807000    1.42893400    0.99157000
 C                  0.10428700    0.75261700    1.59718800
 C                  0.05958300   -0.70224800    1.63051300
 Pt                 1.43711900   -0.01062600    0.12247000
 P                  2.51743500   -1.60401300   -1.23291300
 H                  1.92729800   -1.87268600   -2.49024300
 H                  2.91413000   -2.93006300   -0.94695000
 P                  2.85729500    1.54003800   -0.91868700
 H                  2.39482700    2.21558900   -2.07186900
 H                  3.52310200    2.63617400   -0.32756700
 F                  0.76169200   -1.33292500    2.59771200
 F                  0.77152500    1.40415200    2.57727100
 F                 -0.93420400    2.75930400    1.01173400
 F                 -3.01211900    2.75557600   -0.45853400
 F                 -5.02673900    1.36476400   -1.59958700
 F                 -5.11825200   -1.29183900   -1.47345400
 F                 -3.19605300   -2.69878900   -0.18530500
 F                 -1.09189500   -2.69248700    1.25023300
 C                  4.17598500   -0.90465100   -1.76492800
 C                  4.34509300    0.61826500   -1.59845900
 H                  4.36969300   -1.20551300   -2.80056800
 H                  4.92216200   -1.42336900   -1.15069500
 H                  4.64809400    1.07992400   -2.54487600
 H                  5.15538100    0.81833900   -0.88696100
31
54 C10F8-Pt(dpe) eta1   -2062.53410
 C                  3.88741000   -1.17814100    0.70572100
 C                  2.78251200   -1.60198900    0.03050200
 C                  1.87252400   -0.67450700   -0.53644800
 C                  2.13599900    0.73152800   -0.36261600
 C                  3.29180200    1.12761600    0.35081600
 C                  4.14938900    0.20050600    0.86532400
 C                  0.74703900   -1.08029800   -1.25213300
 C                  1.21239900    1.64608600   -0.86543300
 C                  0.04828700    1.22130500   -1.49982000
 C                 -0.19919100   -0.16985000   -1.78071000
 Pt                -1.40568000    0.09015500   -0.05957800
 P                 -3.36328900   -1.17422300   -0.06043100
 H                 -3.31120000   -2.54294500    0.29906100
 H                 -4.35976800   -1.29201400   -1.05717800
 P                 -2.05401900    0.89894900    2.05302200
 H                 -1.34208200    0.91202800    3.27669900
 H                 -2.63185500    2.18572100    2.17297100
 F                  1.38459700    2.95418500   -0.71179200
 F                 -0.71782100    2.12582400   -2.12333900
 F                 -0.87345600   -0.51129400   -2.90229100
 F                  0.52513300   -2.36969100   -1.50618400
 F                  2.55017600   -2.90691300   -0.07833500
 F                  4.73827700   -2.04841900    1.23671900
 F                  5.23871400    0.56642000    1.53273200
 F                  3.54919600    2.41931500    0.53275800
 C                 -4.38570800   -0.49770200    1.34765300
 H                 -5.18460800   -1.19576200    1.62653600
 H                 -4.86645900    0.41677700    0.96935200
 C                 -3.50620400   -0.16886200    2.55221800
 H                 -4.09223900    0.30755200    3.34764000
 H                 -3.08000500   -1.09336000    2.97024000
 
